# Supplementary material
Source: PubMed Central journal article supplement (PMC8849240)

Supplemental Figure 1. Number of tweets meeting inclusion criteria retrieved by Twitter search between 1 March and 21 June 2020

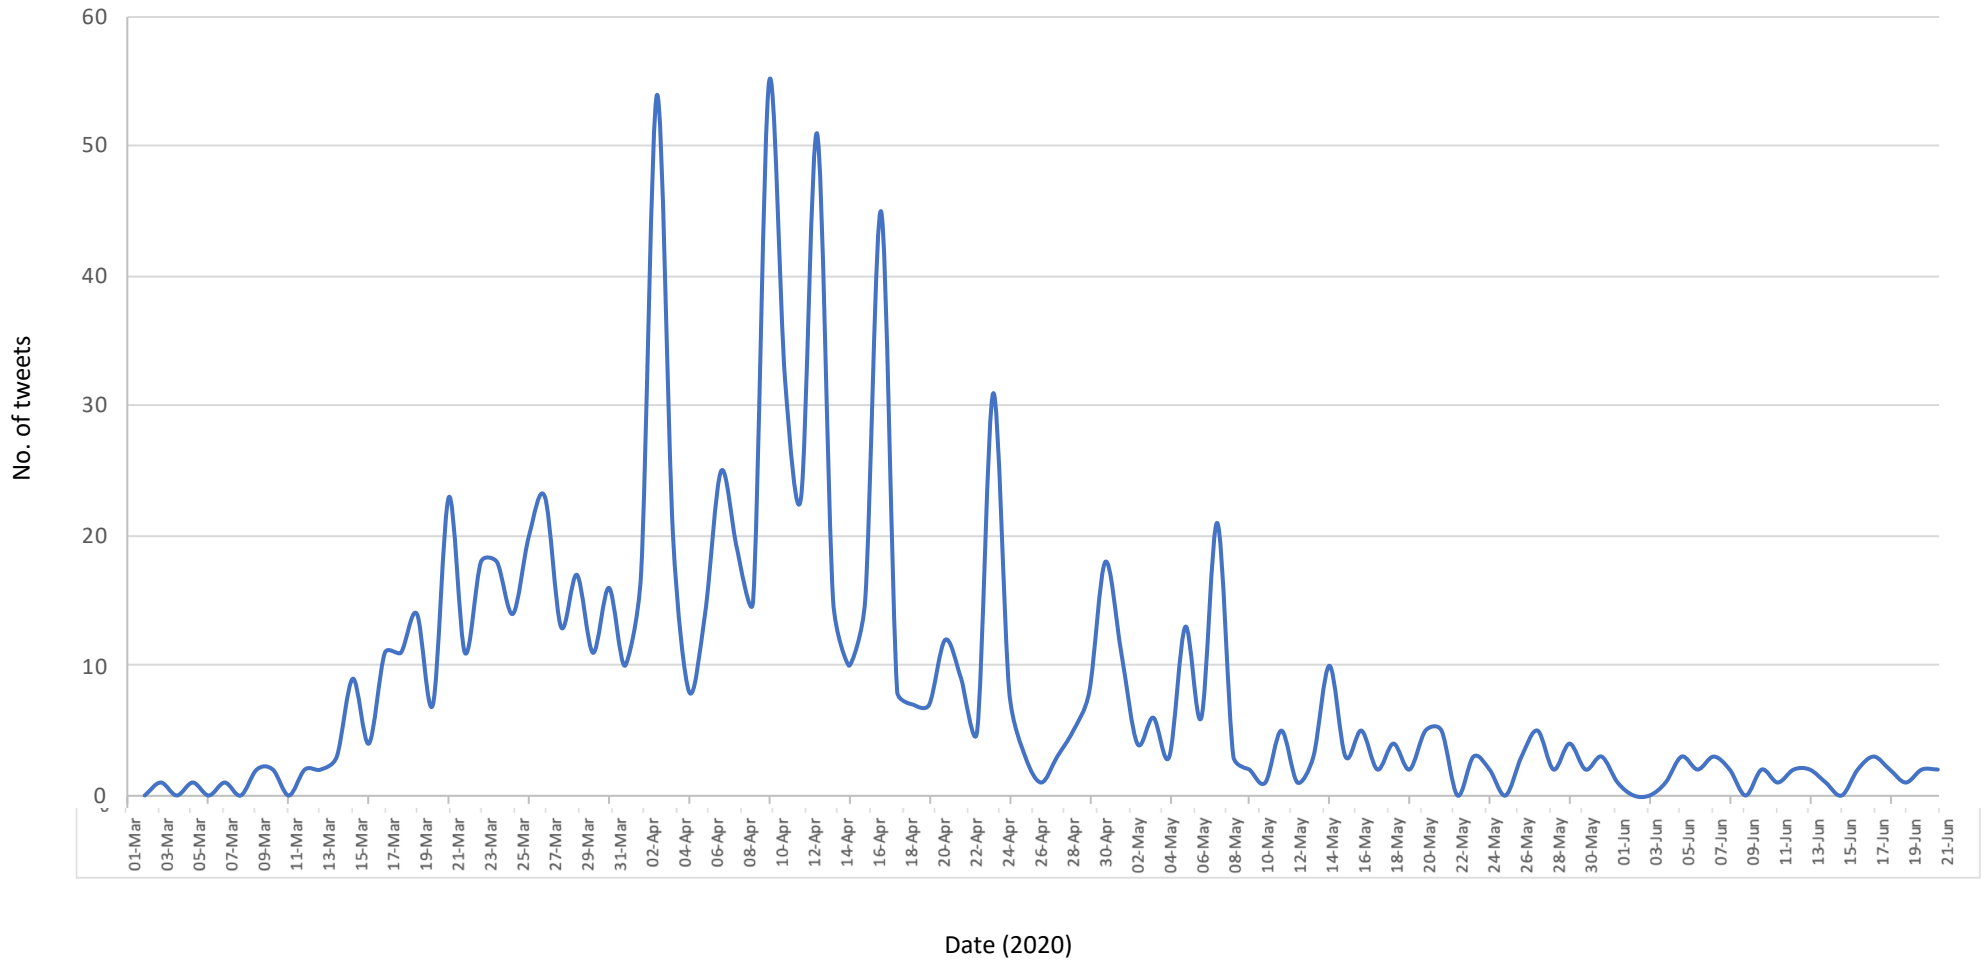

Supplement: HEX-25-149-s001.pdf [file HEX-25-149-s001.pdf]
